# Supplementary material for: Investigating the Impact of Tillage and Crop Rotation on the Prevalence of phlD-Carrying Pseudomonas Potentially Involved in Disease Suppression
Source: MDPI journal article supplement (doi:10.3390/microorganisms11102459), 2023-09-30
Supplement: s1 [file s1]

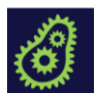

## Supplementary materials

Table S1. Crop rotation history under conventional and conservation tillage practices.

| Year    | Conventional tillage (CT) |        |        |       | Conservation strip tillage (ST) |        |        |        |       |       |
|---------|---------------------------|--------|--------|-------|---------------------------------|--------|--------|--------|-------|-------|
| 2012-13 | Wheat                     | Barley | Oats   | OSR   | Wheat                           | Wheat  | Barley | Oats   | OSR   | Wheat |
| 2013-14 | Barley                    | OSR    | Wheat  | Wheat | Wheat                           | Barley | OSR    | Wheat  | Wheat | Wheat |
| 2014-15 | OSR                       | Wheat  | Barley | Oats  | Wheat                           | OSR    | Wheat  | Barley | Oats  | Wheat |
| 2015-16 | Wheat                     | Oats   | OSR    | Wheat | Wheat                           | Wheat  | Oats   | OSR    | Wheat | Wheat |

\*Samples collected in year 2014-15 and 2015-16 were highlighted with orange colour. The text highlighted with bold letters describe the OSR and wheat samples collected for analysis in each year and show previous crop history. .

Table S2. Crop management practices used for the wheat and OSR winter crops.

| Crops Name             | Variety   | Sowing date | Harvest date | Seed rate             | Fertilizer application kg/ha |      |     | Fungicide application                                                                                                      | Herbicide application                                                           | Insecticide application                                                                       |
|------------------------|-----------|-------------|--------------|-----------------------|------------------------------|------|-----|----------------------------------------------------------------------------------------------------------------------------|---------------------------------------------------------------------------------|-----------------------------------------------------------------------------------------------|
|                        |           |             |              | Seeds /m <sup>2</sup> | N                            | P    | K   |                                                                                                                            |                                                                                 |                                                                                               |
| OSR                    | Compass   | 2/9/14      | 27/7/15      | Year 14/15<br>50      | 225                          | 25.2 | 108 | Proline 0.4 L/ha (in year 2014/15) & 0.6 L/ha (in year 2015/16) for Light leaf spot, Filan 0.5 kg/ha for Phoma stem canker | Katamaran 2L/ha (Pre-sowing), Falcon 1L/ha (Post-sowing)                        | Slug pellets 5kg /ha (in year 2014/15) & 4 kg/ha (in year 2015/16) Sumi Alpha for Flea Beetle |
|                        |           | 9/9/15      | 25/7/16      | Year 15/16<br>60      |                              |      |     |                                                                                                                            |                                                                                 |                                                                                               |
| Wheat (R)<br>Wheat (M) | J B Diego | 30/9/14     | 25/8/15      | 300                   | 225                          | 25.2 | 108 | Caldrum + Bravo (2.5 +1 L/ha), Adexar + Bravo (1.6 + 1 L/ha), Prosaro 1 L/ha for Septoria disease                          | Roundup 0.4 L/ha (Pre-sowing), Alister 1 L/ha (Post-sowing), Pacifica 0.5 kg/ha | Sumi Alpha for Aphids                                                                         |
|                        |           | 30/9/15     | 27/8/16      |                       |                              |      |     |                                                                                                                            |                                                                                 |                                                                                               |

\*(R) means wheat in rotation where the previous crop was OSR and (M) means continuously growing wheat or wheat monoculture where previous crop was wheat.

Table S3. Physical and chemical characterisation of the soil substrates.

| Mineral content (g·kg <sup>-1</sup> ) | Rotation CT     | Rotation ST | Monoculture CT | Monoculture ST |
|---------------------------------------|-----------------|-------------|----------------|----------------|
| Total carbon                          | 3.83            | 3.87        | 3.72           | 3.75           |
| Total nitrogen                        | 0.27            | 0.27        | 0.26           | 0.26           |
| Soil organic matter                   | 6.70            | 6.82        | 6.67           | 6.69           |
| Soil organic carbon                   | 2.74            | 2.77        | 2.71           | 2.71           |
| C/N ratio                             | 12.87           | 13.12       | 12.45          | 12.46          |
| pH                                    | 6.52            | 7.12        | 6.80           | 7.05           |
| Soil classification                   | Sandy clay loam |             |                |                |

\*Rotation = OSR and wheat crops were grown in rotation. Monoculture = wheat was continuously grown in the same plot under CT and ST practices.

Table S4. Climate and weather conditions during the experiment.

| Months    | Max air temp °C |      | Min air temp °C |      | Mean air temp °C | Total rainfall (mm) | Mean wind Speed (ms <sup>-1</sup> ) | Max wind speed (ms <sup>-1</sup> ) | Solar radiation (Wm <sup>-2</sup> ) | Humidity (%) | CBL pressure (Pa) | Soil temperature °C at |      |      |      |
|-----------|-----------------|------|-----------------|------|------------------|---------------------|-------------------------------------|------------------------------------|-------------------------------------|--------------|-------------------|------------------------|------|------|------|
|           | High            | Low  | Low             | High |                  |                     |                                     |                                    |                                     |              |                   | 5cm                    | 10cm | 20cm | 30cm |
| 2014/15   |                 |      |                 |      |                  |                     |                                     |                                    |                                     |              |                   |                        |      |      |      |
| September | 22.8            | 15.6 | 4.4             | 14   | 14.3             | 0.61                | 2.18                                | 07.6                               | 1146                                | 82.05        | 1013              | 16.1                   | 16.1 | 15.9 | 15.6 |
| October   | 17.7            | 13.2 | 0.5             | 14.6 | 11.4             | 4.46                | 4.41                                | 12.5                               | 0613                                | 85.14        | 1001              | 11.4                   | 11.6 | 11.9 | 11.9 |

|          |      |      |      |      |       |      |      |      |      |       |      |      |      |      |      |
|----------|------|------|------|------|-------|------|------|------|------|-------|------|------|------|------|------|
| November | 14.2 | 4.2  | -2.1 | 8.1  | 7.2   | 5.52 | 3.02 | 09.5 | 0300 | 90.49 | 0996 | 7.2  | 7.5  | 8.1  | 8.3  |
| December | 13.5 | 3.0  | -5.3 | 10.8 | 5.6   | 1.54 | 4.32 | 11.7 | 0230 | 87.94 | 1011 | 4.5  | 4.8  | 5.4  | 5.5  |
| January  | 16.2 | 2.1  | -4.8 | 8.5  | 4.99  | 2.13 | 5.33 | 14.3 | 0285 | 85.05 | 1004 | 4.0  | 4.1  | 4.7  | 4.8  |
| February | 12.8 | 3.3  | -5.6 | 7.2  | 4.30  | 1.30 | 3.99 | 11.7 | 0480 | 86.54 | 1009 | 4.0  | 4.1  | 4.3  | 4.3  |
| March    | 14.2 | 5.6  | -2.2 | 9.2  | 6.24  | 1.73 | 4.76 | 13.5 | 1005 | 80.05 | 1012 | 6.5  | 6.5  | 6.5  | 6.4  |
| April    | 18.9 | 9.6  | -0.4 | 7.2  | 8.65  | 0.88 | 3.48 | 10.4 | 1638 | 77.59 | 1014 | 10.9 | 10.9 | 10.5 | 10.1 |
| May      | 19.2 | 9.6  | 1.6  | 11.2 | 10.21 | 2.88 | 4.54 | 12.5 | 1629 | 79.04 | 1006 | 12.6 | 12.5 | 12.1 | 11.8 |
| June     | 24.0 | 11.9 | 3.6  | 15.7 | 13.43 | 0.99 | 4.04 | 10.9 | 2029 | 74.85 | 1012 | 17.4 | 17.2 | 16.4 | 15.9 |
| July     | 23.4 | 16.5 | 6.4  | 13.8 | 14.58 | 2.56 | 4.04 | 11.4 | 1485 | 80.19 | 1005 | 16.7 | 16.6 | 16.5 | 16.1 |
| August   | 23.0 | 14.8 | 6.0  | 13.9 | 14.64 | 2.68 | 3.57 | 10.9 | 1408 | 80.02 | 1005 | 16.7 | 16.6 | 16.4 | 16.0 |

**2015/16**

|           |      |      |      |      |       |      |      |       |         |       |      |      |      |      |      |
|-----------|------|------|------|------|-------|------|------|-------|---------|-------|------|------|------|------|------|
| September | 19.4 | 13.3 | 3.8  | 13.3 | 12.43 | 0.92 | 3.15 | 09.1  | 0993    | 81.53 | 1010 | 13.7 | 13.7 | 13.8 | 13.6 |
| October   | 19.1 | 11.1 | -0.3 | 12.3 | 10.21 | 1.83 | 2.93 | 09.3  | 0523    | 87.17 | 1010 | 10.9 | 11.0 | 11.2 | 11.2 |
| November  | 17.7 | 5.6  | -2.1 | 13.9 | 9.21  | 3.67 | 5.05 | 15.2  | 0255    | 86.56 | 1005 | 8.8  | 8.9  | 9.4  | 9.4  |
| December  | 14.1 | 6.3  | -0.1 | 11.7 | 8.57  | 8.74 | 6.22 | 17.5  | 0146    | 89.45 | 1001 | 7.7  | 7.8  | 8.1  | 8.2  |
| January   | 13.6 | 4.9  | -3.1 | 11.9 | 5.91  | 3.58 | 4.74 | 13.5  | 0230    | 90.77 | 0996 | 5.2  | 5.3  | 5.7  | 5.8  |
| February  | 13.1 | 5.1  | -3.2 | 7.8  | 4.85  | 3.30 | 4.49 | 12.7  | 0440    | 87.28 | 1001 | 4.8  | 4.9  | 5.4  | 5.4  |
| March     | 14.1 | 5.5  | -3.5 | 7.4  | 6.13  | 1.31 | 3.77 | 10.9  | 0862    | 83.28 | 1007 | 6.5  | 6.5  | 6.6  | 6.5  |
| April     | 17.2 | 7.4  | -1.4 | 7.0  | 7.51  | 2.14 | 3.74 | 11.7  | 1323    | 79.48 | 1005 | 9.3  | 9.2  | 9.0  | 8.7  |
| May       | 21.9 | 11.6 | 3.4  | 12.4 | 12.36 | 1.99 | 3.26 | 9.74  | 1742.57 | 80.65 | 1007 | 15.3 | 15.0 | 14.2 | 13.7 |
| June      | 23.7 | 14.3 | 4.7  | 15.1 | 15.07 | 2.06 | 3.21 | 9.52  | 1604.07 | 83.67 | 1007 | 18.1 | 17.8 | 17.4 | 17.0 |
| July      | 27.5 | 15.3 | 6.8  | 15.4 | 15.99 | 0.95 | 3.63 | 10.41 | 1515.66 | 83.31 | 1008 | 18.7 | 18.5 | 18.0 | 17.6 |
| August    | 23.5 | 15.9 | 7.8  | 15.4 | 16.03 | 1.48 | 3.86 | 10.55 | 1295.70 | 82.10 | 1010 | 17.9 | 17.8 | 17.6 | 17.3 |

\*Parameters were recorded for example; temperature in degree Celsius, rainfall in millimetres, wind speed in meters per second, humidity in percentage, Convective Boundary Layer (CBL) atmospheric pressure in Pascal (Pa), and solar radiation in Watt per square meter. OSR and wheat crops were sown in month of September and harvested in July and August respectively. Maximum and minimum air temperatures were reported from the range of high to low.

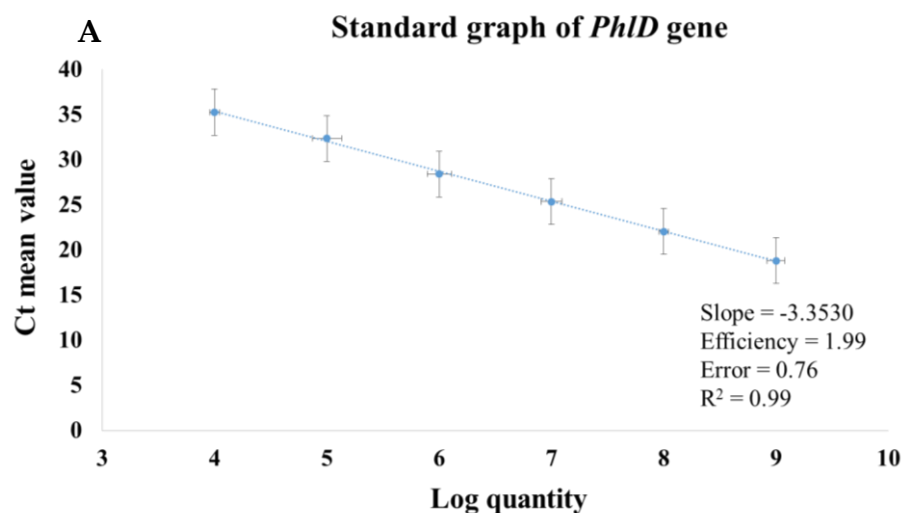

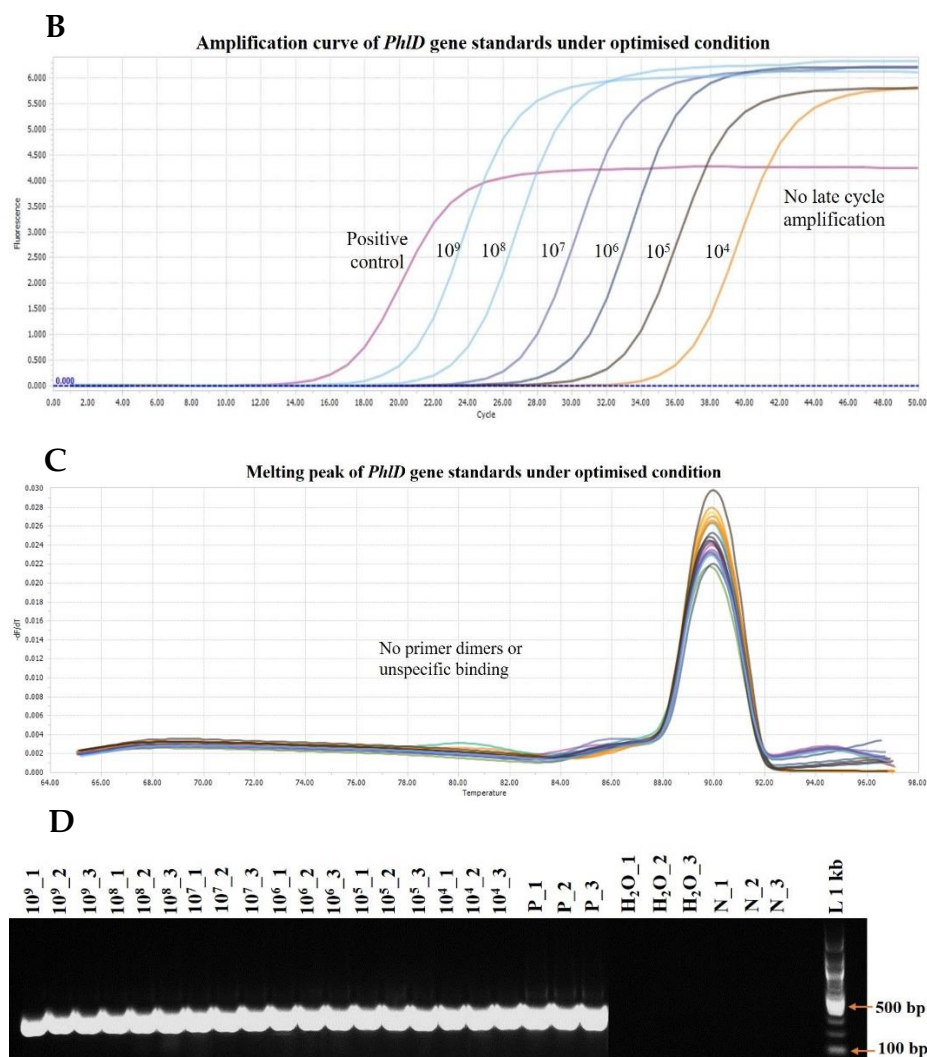

**Figure S1.** Standard curve was generated using 10-fold dilution of the bacterial DNA from *P. fluorescens* strain F113. Each dilution was analysed in triplicate. **A**, Standard curve with the Ct plotted against the log of the starting quantity of DNA for each dilution. **B**, Amplification curves of the dilution series. **C**, Melting pick of each dilution **D**, PCR amplification on agarose gel of each dilution, positive, negative and water control in triplicate. (**P**) positive control *P. fluorescens* F113 DNA, (**N**) negative control *E.coli* DNA.

**Table S5.** Ct value and associated calculations for *PhlD* gene copy number per gram of rhizosphere soil sample from year 2014/15.

| Growth Stage | Crop type | Tillage type | Mean Ct value | Estimated log value | Copy number | Soil in g | DNA con. per µl | Total DNA con. in 50 µl | Total copy no. | Copy no in g soil | Log value g soil <sup>-1</sup> |
|--------------|-----------|--------------|---------------|---------------------|-------------|-----------|-----------------|-------------------------|----------------|-------------------|--------------------------------|
| Vegetative   | OSR       | CT           | 34.34<br>3    | 4.307               | 20261       | 0.25      | 81.3            | 4065                    | 8235917        | 32943668          | 7.52                           |
| Vegetative   | OSR       | CT           | 35.56<br>7    | 3.938               | 8674        | 0.25      | 86.0            | 4300                    | 3730032        | 14920128          | 7.17                           |
| Vegetative   | OSR       | CT           | 33.52<br>7    | 4.553               | 35694       | 0.25      | 83.0            | 4150                    | 14812863       | 59251450          | 7.77                           |
| Vegetative   | OSR       | ST           | 29.42<br>0    | 5.789               | 615623      | 0.25      | 89.0            | 4450                    | 273952454      | 109580981<br>6    | 9.04                           |
| Vegetative   | OSR       | ST           | 27.78<br>3    | 6.282               | 1915129     | 0.25      | 95.0            | 4750                    | 909686199      | 363874479<br>6    | 9.56                           |
| Vegetative   | OSR       | ST           | 30.28<br>0    | 5.530               | 339098      | 0.25      | 91.0            | 4550                    | 154289809      | 617159236         | 8.79                           |

|            |           |    |            |       |         |      |      |      |            |                |      |
|------------|-----------|----|------------|-------|---------|------|------|------|------------|----------------|------|
| Vegetative | Wheat     | CT | 31.15<br>7 | 5.266 | 184636  | 0.25 | 76.7 | 3835 | 70808061   | 283232243      | 8.45 |
| Vegetative | Wheat     | CT | 31.40<br>3 | 5.192 | 155609  | 0.25 | 84.3 | 4215 | 65589021   | 262356083      | 8.42 |
| Vegetative | Wheat     | CT | 31.73<br>3 | 5.093 | 123781  | 0.25 | 80.8 | 4040 | 50007518   | 200030073      | 8.30 |
| Vegetative | Wheat     | ST | 26.75<br>7 | 6.591 | 3902825 | 0.25 | 89.7 | 4485 | 1750416971 | 700166788<br>5 | 9.85 |
| Vegetative | Wheat     | ST | 30.37<br>3 | 5.502 | 317847  | 0.25 | 92.3 | 4615 | 146686511  | 586746046      | 8.77 |
| Vegetative | Wheat     | ST | 28.68<br>0 | 6.012 | 1028410 | 0.25 | 90.4 | 4520 | 464841518  | 185936607<br>2 | 9.27 |
| Vegetative | Wheat (C) | CT | 34.71<br>3 | 4.195 | 15676   | 0.25 | 95.8 | 4790 | 7508640    | 30034560       | 7.48 |
| Vegetative | Wheat (C) | CT | 33.29<br>3 | 4.623 | 41962   | 0.25 | 88.7 | 4435 | 18610282   | 74441127       | 7.87 |
| Vegetative | Wheat (C) | CT | 32.52<br>7 | 4.854 | 71407   | 0.25 | 86.2 | 4310 | 30776453   | 123105811      | 8.09 |
| Vegetative | Wheat (C) | ST | 30.49<br>3 | 5.466 | 292469  | 0.25 | 96.7 | 4835 | 141408953  | 565635811      | 8.75 |
| Vegetative | Wheat (C) | ST | 30.65<br>0 | 5.419 | 262362  | 0.25 | 96.0 | 4800 | 125933547  | 503734188      | 8.70 |
| Vegetative | Wheat (C) | ST | 29.53<br>7 | 5.754 | 567781  | 0.25 | 91.5 | 4575 | 259759877  | 103903950<br>7 | 9.02 |
| Flowering  | OSR       | CT | 37.54<br>7 | 3.342 | 2198    | 0.25 | 72.4 | 3620 | 795564     | 3182254        | 6.50 |
| Flowering  | OSR       | CT | 36.50<br>7 | 3.655 | 4520    | 0.25 | 77.3 | 3865 | 1747078    | 6988311        | 6.84 |
| Flowering  | OSR       | CT | 37.62<br>3 | 3.319 | 2084    | 0.25 | 74.0 | 3700 | 771045     | 3084181        | 6.49 |
| Flowering  | OSR       | ST | 33.58<br>7 | 4.535 | 34239   | 0.25 | 100  | 5000 | 17119532   | 68478126       | 7.84 |
| Flowering  | OSR       | ST | 34.36<br>0 | 4.302 | 20028   | 0.25 | 94.6 | 4730 | 9473127    | 37892509       | 7.58 |
| Flowering  | OSR       | ST | 32.14<br>3 | 4.969 | 93150   | 0.25 | 97.0 | 4850 | 45177689   | 180710757      | 8.26 |
| Flowering  | Wheat     | CT | 36.47<br>7 | 3.664 | 4615    | 0.25 | 78.1 | 3905 | 1802263    | 7209054        | 6.86 |
| Flowering  | Wheat     | CT | 35.32<br>3 | 4.012 | 10269   | 0.25 | 84.9 | 4245 | 4359149    | 17436596       | 7.24 |
| Flowering  | Wheat     | CT | 35.85<br>0 | 3.853 | 7127    | 0.25 | 87.3 | 4365 | 3111017    | 12444068       | 7.09 |
| Flowering  | Wheat     | ST | 34.49<br>0 | 4.262 | 18301   | 0.25 | 85.7 | 4285 | 7842120    | 31368482       | 7.50 |
| Flowering  | Wheat     | ST | 31.69<br>7 | 5.104 | 126969  | 0.25 | 83.9 | 4195 | 53263302   | 213053207      | 8.33 |
| Flowering  | Wheat     | ST | 36.40<br>7 | 3.685 | 4845    | 0.25 | 91.3 | 4565 | 2211661    | 8846644        | 6.95 |
| Flowering  | Wheat (C) | CT | 37.42<br>3 | 3.379 | 2394    | 0.25 | 79.2 | 3960 | 947989     | 3791957        | 6.58 |
| Flowering  | Wheat (C) | CT | 35.68<br>3 | 3.903 | 8000    | 0.25 | 81.7 | 4085 | 3268150    | 13072599       | 7.12 |
| Flowering  | Wheat (C) | CT | 37.36<br>7 | 3.396 | 2490    | 0.25 | 70.9 | 3545 | 882652     | 3530609        | 6.55 |
| Flowering  | Wheat (C) | ST | 31.36<br>7 | 5.203 | 159616  | 0.25 | 99.9 | 4995 | 79728068   | 318912273      | 8.50 |
| Flowering  | Wheat (C) | ST | 35.78<br>7 | 3.872 | 7447    | 0.25 | 93.7 | 4685 | 3488997    | 13955988       | 7.14 |
| Flowering  | Wheat (C) | ST | 33.58<br>7 | 4.535 | 34239   | 0.25 | 87.6 | 4380 | 14996710   | 59986839       | 7.78 |

|            |           |    |        |       |         |      |      |      |            |            |      |
|------------|-----------|----|--------|-------|---------|------|------|------|------------|------------|------|
| Harvesting | OSR       | CT | 36.507 | 3.655 | 4520    | 0.25 | 89.3 | 4465 | 2018293    | 8073171    | 6.91 |
| Harvesting | OSR       | CT | 39.510 | 2.751 | 563     | 0.25 | 73.0 | 3650 | 205589     | 822357     | 5.92 |
| Harvesting | OSR       | CT | 32.730 | 4.793 | 62017   | 0.25 | 84.0 | 4200 | 26046938   | 104187750  | 8.02 |
| Harvesting | OSR       | ST | 28.453 | 6.080 | 1203448 | 0.25 | 82.1 | 4105 | 494015293  | 1976061172 | 9.30 |
| Harvesting | OSR       | ST | 27.523 | 6.360 | 2293491 | 0.25 | 88.0 | 4400 | 1009136176 | 4036544705 | 9.61 |
| Harvesting | OSR       | ST | 26.690 | 6.611 | 4087481 | 0.25 | 78.0 | 3900 | 1594117642 | 6376470567 | 9.80 |
| Harvesting | Wheat     | CT | ND     | ND    | ND      | 0.25 | 70.2 | 3510 | ND         | ND         | ND   |
| Harvesting | Wheat     | CT | ND     | ND    | ND      | 0.25 | 75.9 | 3795 | ND         | ND         | ND   |
| Harvesting | Wheat     | CT | ND     | ND    | ND      | 0.25 | 77.7 | 3885 | ND         | ND         | ND   |
| Harvesting | Wheat     | ST | 35.690 | 3.901 | 7963    | 0.25 | 81.1 | 4055 | 3229186    | 12916744   | 7.11 |
| Harvesting | Wheat     | ST | 37.157 | 3.459 | 2880    | 0.25 | 80.0 | 4000 | 1152060    | 4608238    | 6.66 |
| Harvesting | Wheat     | ST | 38.847 | 2.950 | 892     | 0.25 | 85.5 | 4275 | 381423     | 1525692    | 6.18 |
| Harvesting | Wheat (C) | CT | 39.810 | 2.660 | 457     | 0.25 | 88.3 | 4415 | 201973     | 807892     | 5.91 |
| Harvesting | Wheat (C) | CT | 40.307 | 2.511 | 324     | 0.25 | 80.6 | 4030 | 130646     | 522584     | 5.72 |
| Harvesting | Wheat (C) | CT | 41.420 | 2.176 | 150     | 0.25 | 86.0 | 4300 | 64414      | 257655     | 5.41 |
| Harvesting | Wheat (C) | ST | 36.440 | 3.675 | 4734    | 0.25 | 81.0 | 4050 | 1917319    | 7669277    | 6.88 |
| Harvesting | Wheat (C) | ST | 37.260 | 3.428 | 2681    | 0.25 | 89.0 | 4450 | 1193043    | 4772172    | 6.68 |
| Harvesting | Wheat (C) | ST | 39.293 | 2.816 | 655     | 0.25 | 86.0 | 4300 | 281466     | 1125863    | 6.05 |

**Table S6.** Ct value and associated calculations for *PhlD* gene copy number per gram of rhizosphere soil sample from year 2015/16.

| Growth Stage | Tillage type | Crop type | Mean Ct value | Estimated log value | Copy number | Soil in g | DNA con. per $\mu$ l | Total DNA con. in 50 $\mu$ l | Total copy no. | Copy no in g soil | Log value g soil <sup>-1</sup> |
|--------------|--------------|-----------|---------------|---------------------|-------------|-----------|----------------------|------------------------------|----------------|-------------------|--------------------------------|
| Vegetative   | OSR          | CT        | 33.287        | 4.625               | 42157       | 0.25      | 86.0                 | 4300                         | 18127397       | 72509588          | 7.86                           |
| Vegetative   | OSR          | CT        | 35.687        | 3.902               | 7982        | 0.25      | 80.6                 | 4030                         | 3216704        | 12866816          | 7.11                           |
| Vegetative   | OSR          | CT        | 35.377        | 3.995               | 9896        | 0.25      | 88.3                 | 4415                         | 4369114        | 17476456          | 7.24                           |
| Vegetative   | OSR          | ST        | 29.533        | 5.755               | 569095      | 0.25      | 86.0                 | 4300                         | 244710870      | 978843481         | 8.99                           |
| Vegetative   | OSR          | ST        | 27.693        | 6.309               | 2038457     | 0.25      | 89.0                 | 4450                         | 907113317      | 3628453269        | 9.56                           |
| Vegetative   | OSR          | ST        | 30.437        | 5.483               | 304190      | 0.25      | 81.0                 | 4050                         | 123197144      | 492788575         | 8.69                           |
| Vegetative   | Wheat        | CT        | 34.400        | 4.290               | 19480       | 0.25      | 85.5                 | 4275                         | 8327648        | 33310590          | 7.52                           |
| Vegetative   | Wheat        | CT        | 33.600        | 4.531               | 33924       | 0.25      | 80.0                 | 4000                         | 13569584       | 54278335          | 7.73                           |
| Vegetative   | Wheat        | CT        | 33.437        | 4.580               | 37992       | 0.25      | 81.8                 | 4090                         | 15538809       | 62155238          | 7.79                           |
| Vegetative   | Wheat        | ST        | 27.517        | 6.363               | 2304118     | 0.25      | 77.7                 | 3885                         | 895149949      | 3580599797        | 9.55                           |
| Vegetative   | Wheat        | ST        | 31.663        | 5.114               | 129937      | 0.25      | 75.9                 | 3795                         | 49311277       | 197245106         | 8.30                           |
| Vegetative   | Wheat        | ST        | 28.307        | 6.125               | 1332281     | 0.25      | 70.2                 | 3510                         | 467630763      | 1870523050        | 9.27                           |
| Vegetative   | Wheat (C)    | CT        | 35.467        | 3.968               | 9297        | 0.25      | 78.0                 | 3900                         | 3625966        | 14503864          | 7.16                           |

|            |           |    |        |       |         |      |      |      |            |            |      |
|------------|-----------|----|--------|-------|---------|------|------|------|------------|------------|------|
| Vegetative | Wheat (C) | CT | 35.577 | 3.935 | 8615    | 0.25 | 88.0 | 4400 | 3790402    | 15161608   | 7.18 |
| Vegetative | Wheat (C) | CT | 34.330 | 4.311 | 20449   | 0.25 | 82.1 | 4105 | 8394212    | 33576846   | 7.53 |
| Vegetative | Wheat (C) | ST | 30.090 | 5.588 | 386852  | 0.25 | 84.0 | 4200 | 162477680  | 649910721  | 8.81 |
| Vegetative | Wheat (C) | ST | 29.427 | 5.787 | 612784  | 0.25 | 73.0 | 3650 | 223666210  | 894664841  | 8.95 |
| Vegetative | Wheat (C) | ST | 30.427 | 5.486 | 306307  | 0.25 | 89.3 | 4465 | 136766138  | 547064552  | 8.74 |
| Flowering  | OSR       | CT | 41.177 | 2.249 | 177     | 0.25 | 87.6 | 4380 | 77672      | 310688     | 5.49 |
| Flowering  | OSR       | CT | 40.273 | 2.521 | 332     | 0.25 | 93.7 | 4685 | 155432     | 621726     | 5.79 |
| Flowering  | OSR       | CT | 39.450 | 2.769 | 587     | 0.25 | 99.9 | 4995 | 293300     | 1173200    | 6.07 |
| Flowering  | OSR       | ST | 36.633 | 3.617 | 4140    | 0.25 | 70.9 | 3545 | 1467686    | 5870745    | 6.77 |
| Flowering  | OSR       | ST | 39.470 | 2.763 | 579     | 0.25 | 81.7 | 4085 | 236562     | 946250     | 5.98 |
| Flowering  | OSR       | ST | 37.617 | 3.321 | 2094    | 0.25 | 79.2 | 3960 | 829050     | 3316202    | 6.52 |
| Flowering  | Wheat     | CT | 47.467 | 0.355 | 2       | 0.25 | 90.4 | 4520 | 1023       | 4090       | 3.61 |
| Flowering  | Wheat     | CT | 45.480 | 0.953 | 9       | 0.25 | 92.3 | 4615 | 4140       | 16560      | 4.22 |
| Flowering  | Wheat     | CT | 48.553 | 0.027 | 1       | 0.25 | 89.7 | 4485 | 478        | 1910       | 3.28 |
| Flowering  | Wheat     | ST | 33.360 | 4.603 | 40067   | 0.25 | 87.3 | 4365 | 17489077   | 69956306   | 7.84 |
| Flowering  | Wheat     | ST | 31.500 | 5.163 | 145520  | 0.25 | 84.9 | 4245 | 61773194   | 247092776  | 8.39 |
| Flowering  | Wheat     | ST | 35.150 | 4.064 | 11580   | 0.25 | 78.1 | 3905 | 4522145    | 18088579   | 7.26 |
| Flowering  | Wheat (C) | CT | 45.500 | 0.947 | 9       | 0.25 | 90.4 | 4520 | 3999       | 15996      | 4.20 |
| Flowering  | Wheat (C) | CT | 48.200 | 0.134 | 1       | 0.25 | 69.4 | 3468 | 472        | 1887       | 3.28 |
| Flowering  | Wheat (C) | CT | 48.630 | 0.004 | 1       | 0.25 | 70.1 | 3506 | 354        | 1416       | 3.15 |
| Flowering  | Wheat (C) | ST | 40.450 | 2.468 | 294     | 0.25 | 74.0 | 3700 | 108600     | 434398     | 5.64 |
| Flowering  | Wheat (C) | ST | 47.730 | 0.275 | 2       | 0.25 | 77.3 | 3865 | 728        | 2914       | 3.46 |
| Flowering  | Wheat (C) | ST | 48.497 | 0.044 | 1       | 0.25 | 72.4 | 3620 | 401        | 1604       | 3.21 |
| Harvesting | OSR       | CT | 31.690 | 5.106 | 127557  | 0.25 | 91.5 | 4575 | 58357259   | 233429037  | 8.37 |
| Harvesting | OSR       | CT | 33.530 | 4.552 | 35611   | 0.25 | 96.0 | 4800 | 17093394   | 68373575   | 7.83 |
| Harvesting | OSR       | CT | 33.533 | 4.551 | 35529   | 0.25 | 96.7 | 4835 | 17178281   | 68713125   | 7.84 |
| Harvesting | OSR       | ST | 27.713 | 6.303 | 2010382 | 0.25 | 86.2 | 4310 | 866474516  | 3465898064 | 9.54 |
| Harvesting | OSR       | ST | 26.690 | 6.611 | 4087481 | 0.25 | 88.7 | 4435 | 1812797882 | 7251191529 | 9.86 |
| Harvesting | OSR       | ST | 27.617 | 6.332 | 2149759 | 0.25 | 95.8 | 4790 | 1029734449 | 4118937798 | 9.61 |
| Harvesting | Wheat     | CT | ND     | ND    | ND      | 0.25 | 78.6 | 3911 | ND         | ND         | ND   |
| Harvesting | Wheat     | CT | ND     | ND    | ND      | 0.25 | 76.0 | 3799 | ND         | ND         | ND   |
| Harvesting | Wheat     | CT | ND     | ND    | ND      | 0.25 | 77.9 | 3887 | ND         | ND         | ND   |
| Harvesting | Wheat     | ST | 39.703 | 2.692 | 493     | 0.25 | 80.8 | 4040 | 199006     | 796025     | 5.90 |
| Harvesting | Wheat     | ST | 37.533 | 3.346 | 2218    | 0.25 | 84.3 | 4215 | 934930     | 3739721    | 6.57 |
| Harvesting | Wheat     | ST | 31.770 | 5.082 | 120673  | 0.25 | 76.7 | 3835 | 46278271   | 185113084  | 8.27 |
| Harvesting | Wheat (C) | CT | 47.293 | 0.407 | 3       | 0.25 | 91.0 | 4550 | 1161       | 4643       | 3.67 |
| Harvesting | Wheat (C) | CT | 47.487 | 0.349 | 2       | 0.25 | 95.0 | 4750 | 1060       | 4239       | 3.63 |
| Harvesting | Wheat (C) | CT | 44.873 | 1.136 | 14      | 0.25 | 89.0 | 4450 | 6080       | 24320      | 4.39 |
| Harvesting | Wheat (C) | ST | 35.303 | 4.018 | 10412   | 0.25 | 83.0 | 4150 | 4321108    | 17284432   | 7.24 |
| Harvesting | Wheat (C) | ST | 36.617 | 3.622 | 4188    | 0.25 | 86.0 | 4300 | 1800962    | 7203849    | 6.86 |

|            |           |    |        |       |      |      |      |      |        |         |      |
|------------|-----------|----|--------|-------|------|------|------|------|--------|---------|------|
| Harvesting | Wheat (C) | ST | 37.593 | 3.328 | 2128 | 0.25 | 81.3 | 4065 | 864914 | 3459658 | 6.54 |
|------------|-----------|----|--------|-------|------|------|------|------|--------|---------|------|

**Table S7.** Ct value and associated calculations for *PhlD* gene copy number per gram of root sample from year 2014/15.

| Growth Stage | Crop type | Tillage type | Mean Ct value | Estimated log value | Copy number | Root wt. in g | DNA con. per µl | Total DNA con. in 50 µl | Total copy number | Copy number in g root | Log value g root <sup>-1</sup> |
|--------------|-----------|--------------|---------------|---------------------|-------------|---------------|-----------------|-------------------------|-------------------|-----------------------|--------------------------------|
| Vegetative   | OSR       | CT           | 33.513        | 4.557               | 36025       | 0.5           | 118             | 5900                    | 21254860          | 42509720              | 7.63                           |
| Vegetative   | OSR       | CT           | 30.633        | 5.424               | 265411      | 0.5           | 108             | 5400                    | 143322090         | 286644179             | 8.46                           |
| Vegetative   | OSR       | CT           | 30.923        | 5.337               | 217063      | 0.5           | 112             | 5600                    | 121555268         | 243110536             | 8.39                           |
| Vegetative   | OSR       | ST           | 27.660        | 6.319               | 2086123     | 0.5           | 102             | 5100                    | 1063922649        | 2127845298            | 9.33                           |
| Vegetative   | OSR       | ST           | 27.840        | 6.265               | 1841335     | 0.5           | 100             | 5000                    | 920667498         | 1841334996            | 9.27                           |
| Vegetative   | OSR       | ST           | 27.613        | 6.333               | 2154783     | 0.5           | 110             | 5500                    | 1185130817        | 2370261634            | 9.37                           |
| Vegetative   | Wheat     | CT           | 35.833        | 3.858               | 7210        | 0.5           | 146             | 7300                    | 5263325           | 10526650              | 7.02                           |
| Vegetative   | Wheat     | CT           | 35.260        | 4.031               | 10730       | 0.5           | 151             | 7550                    | 8101097           | 16202194              | 7.21                           |
| Vegetative   | Wheat     | CT           | 37.453        | 3.370               | 2345        | 0.5           | 150             | 7500                    | 1758470           | 3516940               | 6.55                           |
| Vegetative   | Wheat     | ST           | 31.617        | 5.128               | 134211      | 0.5           | 130             | 6500                    | 87237158          | 174474315             | 8.24                           |
| Vegetative   | Wheat     | ST           | 33.733        | 4.490               | 30928       | 0.5           | 136             | 6800                    | 21031104          | 42062207              | 7.62                           |
| Vegetative   | Wheat     | ST           | 32.450        | 4.877               | 75306       | 0.5           | 121             | 6050                    | 45560120          | 91120241              | 7.96                           |
| Vegetative   | Wheat (C) | CT           | 33.690        | 4.503               | 31872       | 0.5           | 107             | 5350                    | 17051272          | 34102544              | 7.53                           |
| Vegetative   | Wheat (C) | CT           | 32.223        | 4.945               | 88123       | 0.5           | 111             | 5550                    | 48908374          | 97816749              | 7.99                           |
| Vegetative   | Wheat (C) | CT           | 35.437        | 3.977               | 9493        | 0.5           | 114             | 5700                    | 5410887           | 10821775              | 7.03                           |
| Vegetative   | Wheat (C) | ST           | 31.657        | 5.116               | 130540      | 0.5           | 105             | 5250                    | 68533267          | 137066535             | 8.14                           |
| Vegetative   | Wheat (C) | ST           | 34.520        | 4.253               | 17925       | 0.5           | 100             | 5000                    | 8962273           | 17924546              | 7.25                           |
| Vegetative   | Wheat (C) | ST           | 36.590        | 3.630               | 4266        | 0.5           | 103             | 5150                    | 2197223           | 4394445               | 6.64                           |
| Flowering    | OSR       | CT           | 37.447        | 3.372               | 2355        | 0.5           | 145             | 7250                    | 1707731           | 3415461               | 6.53                           |
| Flowering    | OSR       | CT           | 36.203        | 3.747               | 5578        | 0.5           | 142             | 7100                    | 3960682           | 7921365               | 6.90                           |
| Flowering    | OSR       | CT           | 35.353        | 4.002               | 10057       | 0.5           | 140             | 7000                    | 7040241           | 14080483              | 7.15                           |
| Flowering    | OSR       | ST           | 35.547        | 3.944               | 8796        | 0.5           | 120             | 6000                    | 5277380           | 10554760              | 7.02                           |
| Flowering    | OSR       | ST           | 34.203        | 4.349               | 22326       | 0.5           | 113             | 5650                    | 12614235          | 25228470              | 7.40                           |
| Flowering    | OSR       | ST           | 33.450        | 4.576               | 37643       | 0.5           | 109             | 5450                    | 20515192          | 41030385              | 7.61                           |
| Flowering    | Wheat     | CT           | 35.763        | 3.879               | 7569        | 0.5           | 112             | 5600                    | 4238438           | 8476877               | 6.93                           |
| Flowering    | Wheat     | CT           | 35.563        | 3.939               | 8695        | 0.5           | 119             | 5950                    | 5173267           | 10346534              | 7.01                           |
| Flowering    | Wheat     | CT           | 35.530        | 3.949               | 8898        | 0.5           | 102             | 5100                    | 4537916           | 9075832               | 6.96                           |
| Flowering    | Wheat     | ST           | 36.217        | 3.742               | 5527        | 0.5           | 135             | 6750                    | 3730784           | 7461568               | 6.87                           |
| Flowering    | Wheat     | ST           | 35.357        | 4.001               | 10034       | 0.5           | 129             | 6450                    | 6472103           | 12944205              | 7.11                           |
| Flowering    | Wheat     | ST           | 38.657        | 3.008               | 1018        | 0.5           | 137             | 6850                    | 697236            | 1394472               | 6.14                           |
| Flowering    | Wheat (C) | CT           | 35.580        | 3.934               | 8595        | 0.5           | 152             | 7600                    | 6531942           | 13063885              | 7.12                           |
| Flowering    | Wheat (C) | CT           | 37.323        | 3.409               | 2566        | 0.5           | 146             | 7300                    | 1873036           | 3746072               | 6.57                           |
| Flowering    | Wheat (C) | CT           | 36.657        | 3.610               | 4074        | 0.5           | 139             | 6950                    | 2831229           | 5662458               | 6.75                           |
| Flowering    | Wheat (C) | ST           | 33.543        | 4.548               | 35284       | 0.5           | 116             | 5800                    | 20464433          | 40928866              | 7.61                           |
| Flowering    | Wheat (C) | ST           | 32.617        | 4.827               | 67087       | 0.5           | 122             | 6100                    | 40923012          | 81846024              | 7.91                           |
| Flowering    | Wheat (C) | ST           | 34.307        | 4.318               | 20782       | 0.5           | 110             | 5500                    | 11430264          | 22860529              | 7.36                           |

|            |           |    |        |       |              |     |     |      |                 |                 |       |
|------------|-----------|----|--------|-------|--------------|-----|-----|------|-----------------|-----------------|-------|
| Harvesting | OSR       | CT | 34.427 | 4.282 | 19123        | 0.5 | 120 | 6000 | 11473787        | 22947574        | 7.36  |
| Harvesting | OSR       | CT | 35.287 | 4.023 | 10533        | 0.5 | 107 | 5350 | 5635338         | 11270676        | 7.05  |
| Harvesting | OSR       | CT | 36.520 | 3.651 | 4479         | 0.5 | 116 | 5800 | 2597619         | 5195237         | 6.72  |
| Harvesting | OSR       | ST | 27.633 | 6.327 | 2125057      | 0.5 | 142 | 7100 | 150879037<br>3  | 301758074<br>5  | 9.48  |
| Harvesting | OSR       | ST | 27.797 | 6.278 | 1897504      | 0.5 | 139 | 6950 | 131876515<br>1  | 263753030<br>3  | 9.42  |
| Harvesting | OSR       | ST | 24.823 | 7.174 | 1491431<br>0 | 0.5 | 136 | 6800 | 101417307<br>59 | 202834615<br>18 | 10.31 |
| Harvesting | Wheat     | CT | 34.937 | 4.128 | 13427        | 0.5 | 150 | 7500 | 10070015        | 20140029        | 7.30  |
| Harvesting | Wheat     | CT | 36.333 | 3.707 | 5098         | 0.5 | 155 | 7750 | 3950607         | 7901214         | 6.90  |
| Harvesting | Wheat     | CT | 37.650 | 3.311 | 2046         | 0.5 | 144 | 7200 | 1472923         | 2945845         | 6.47  |
| Harvesting | Wheat     | ST | 36.010 | 3.805 | 6379         | 0.5 | 159 | 7950 | 5071089         | 10142178        | 7.01  |
| Harvesting | Wheat     | ST | 36.447 | 3.673 | 4712         | 0.5 | 153 | 7650 | 3604900         | 7209799         | 6.86  |
| Harvesting | Wheat     | ST | 33.343 | 4.608 | 40532        | 0.5 | 151 | 7550 | 30601926        | 61203851        | 7.79  |
| Harvesting | Wheat (C) | CT | 36.663 | 3.608 | 4055         | 0.5 | 134 | 6700 | 2716798         | 5433595         | 6.74  |
| Harvesting | Wheat (C) | CT | 38.300 | 3.115 | 1303         | 0.5 | 133 | 6650 | 866805          | 1733610         | 6.24  |
| Harvesting | Wheat (C) | CT | 35.440 | 3.976 | 9471         | 0.5 | 138 | 6900 | 6534899         | 13069799        | 7.12  |
| Harvesting | Wheat (C) | ST | 30.630 | 5.425 | 266025       | 0.5 | 106 | 5300 | 140993495       | 281986990       | 8.45  |
| Harvesting | Wheat (C) | ST | 28.727 | 5.998 | 995664       | 0.5 | 111 | 5550 | 552593502       | 110518700<br>5  | 9.04  |
| Harvesting | Wheat (C) | ST | 28.963 | 5.927 | 844969       | 0.5 | 105 | 5250 | 443608475       | 887216949       | 8.95  |

**Table S8.** Ct value and associated calculations for *PhlD* gene copy number per gram of root sample from year 2015/16.

| Growth Stage | Crop type | Tillage type | Mean Ct value | Estimated log value | Copy number | Root wt. in g | DNA con. per µl | Total DNA con. in 50 µl | Total copy number | Copy number in g root | Log value g root <sup>-1</sup> |
|--------------|-----------|--------------|---------------|---------------------|-------------|---------------|-----------------|-------------------------|-------------------|-----------------------|--------------------------------|
| Vegetative   | OSR       | CT           | 33.643        | 4.517               | 32919.76    | 0.5           | 142             | 7100                    | 23373031          | 46746062              | 7.67                           |
| Vegetative   | OSR       | CT           | 32.427        | 4.884               | 76534.34    | 0.5           | 140             | 7000                    | 53574037          | 107148073             | 8.03                           |
| Vegetative   | OSR       | CT           | 31.290        | 5.226               | 168330.9    | 0.5           | 136             | 6800                    | 114465039         | 228930077             | 8.36                           |
| Vegetative   | OSR       | ST           | 29.903        | 5.644               | 440310.6    | 0.5           | 130             | 6500                    | 286201903         | 572403805             | 8.76                           |
| Vegetative   | OSR       | ST           | 33.510        | 4.558               | 36108.55    | 0.5           | 135             | 6750                    | 24373272          | 48746545              | 7.69                           |
| Vegetative   | OSR       | ST           | 33.473        | 4.569               | 37038.4     | 0.5           | 121             | 6050                    | 22408234          | 44816468              | 7.65                           |
| Vegetative   | Wheat     | CT           | 35.587        | 3.932               | 8555.021    | 0.5           | 147             | 7350                    | 6287941           | 12575881              | 7.10                           |
| Vegetative   | Wheat     | CT           | 34.597        | 4.230               | 16996.52    | 0.5           | 152             | 7600                    | 12917354          | 25834708              | 7.41                           |
| Vegetative   | Wheat     | CT           | 36.670        | 3.606               | 4036.22     | 0.5           | 144             | 7200                    | 2906078           | 5812157               | 6.76                           |
| Vegetative   | Wheat     | ST           | 32.433        | 4.882               | 76181.35    | 0.5           | 157             | 7850                    | 59802359          | 119604719             | 8.08                           |
| Vegetative   | Wheat     | ST           | 31.620        | 5.127               | 133901.2    | 0.5           | 145             | 7250                    | 97078336          | 194156672             | 8.29                           |
| Vegetative   | Wheat     | ST           | 33.730        | 4.491               | 30999.66    | 0.5           | 152             | 7600                    | 23559744          | 47119489              | 7.67                           |
| Vegetative   | Wheat (C) | CT           | 33.756        | 4.484               | 30445.78    | 0.5           | 111             | 5550                    | 16897407          | 33794813              | 7.53                           |
| Vegetative   | Wheat (C) | CT           | 34.555        | 4.243               | 17494.76    | 0.5           | 120             | 6000                    | 10496854          | 20993708              | 7.32                           |
| Vegetative   | Wheat (C) | CT           | 32.964        | 4.722               | 52727.62    | 0.5           | 109             | 5450                    | 28736554          | 57473108              | 7.76                           |
| Vegetative   | Wheat (C) | ST           | 34.630        | 4.220               | 16608.16    | 0.5           | 118             | 5900                    | 9798817           | 19597634              | 7.29                           |
| Vegetative   | Wheat (C) | ST           | 33.437        | 4.580               | 37992.2     | 0.5           | 126             | 6300                    | 23935085          | 47870171              | 7.68                           |
| Vegetative   | Wheat (C) | ST           | 30.320        | 5.518               | 329822.2    | 0.5           | 122             | 6100                    | 201191516         | 402383033             | 8.60                           |
| Flowering    | OSR       | CT           | 36.643        | 3.614               | 4111.549    | 0.5           | 146             | 7300                    | 3001431           | 6002862               | 6.78                           |
| Flowering    | OSR       | CT           | 34.703        | 4.198               | 15784.73    | 0.5           | 153             | 7650                    | 12075321          | 24150643              | 7.38                           |
| Flowering    | OSR       | CT           | 34.780        | 4.175               | 14967.49    | 0.5           | 150             | 7500                    | 11225620          | 22451240              | 7.35                           |
| Flowering    | OSR       | ST           | 34.510        | 4.256               | 18049.27    | 0.5           | 143             | 7150                    | 12905229          | 25810458              | 7.41                           |
| Flowering    | OSR       | ST           | 35.440        | 3.976               | 9470.869    | 0.5           | 136             | 6800                    | 6440191           | 12880381              | 7.11                           |
| Flowering    | OSR       | ST           | 31.443        | 5.180               | 151351.8    | 0.5           | 140             | 7000                    | 105946251         | 211892502             | 8.33                           |
| Flowering    | Wheat     | CT           | 35.470        | 3.967               | 9275.884    | 0.5           | 129             | 6450                    | 5982945           | 11965890              | 7.08                           |
| Flowering    | Wheat     | CT           | 35.600        | 3.928               | 8476.289    | 0.5           | 133             | 6650                    | 5636732           | 11273464              | 7.05                           |



|            |           |    |        |       |          |     |     |      |                |                |       |
|------------|-----------|----|--------|-------|----------|-----|-----|------|----------------|----------------|-------|
| Flowering  | Wheat     | CT | 35.493 | 3.960 | 9127.008 | 0.5 | 125 | 6250 | 5704380        | 11408761       | 7.06  |
| Flowering  | Wheat     | ST | 32.563 | 4.843 | 69614.4  | 0.5 | 157 | 7850 | 54647307       | 109294615      | 8.04  |
| Flowering  | Wheat     | ST | 34.697 | 4.200 | 15857.87 | 0.5 | 153 | 7650 | 12131273       | 24262546       | 7.38  |
| Flowering  | Wheat     | ST | 35.623 | 3.921 | 8340.247 | 0.5 | 160 | 8000 | 6672197        | 13344395       | 7.13  |
| Flowering  | Wheat (C) | CT | 32.807 | 4.769 | 58805.67 | 0.5 | 100 | 5000 | 29402834       | 58805667       | 7.77  |
| Flowering  | Wheat (C) | CT | 35.480 | 3.964 | 9211.785 | 0.5 | 141 | 7050 | 6494308        | 12988617       | 7.11  |
| Flowering  | Wheat (C) | CT | 33.737 | 4.489 | 30856.69 | 0.5 | 111 | 5550 | 17125462       | 34250924       | 7.53  |
| Flowering  | Wheat (C) | ST | 33.023 | 4.704 | 50613.96 | 0.5 | 145 | 7250 | 36695121       | 73390241       | 7.87  |
| Flowering  | Wheat (C) | ST | 35.443 | 3.975 | 9449.003 | 0.5 | 139 | 6950 | 6567057        | 13134114       | 7.12  |
| Flowering  | Wheat (C) | ST | 33.890 | 4.443 | 27744.25 | 0.5 | 142 | 7100 | 19698414       | 39396829       | 7.60  |
| Harvesting | OSR       | CT | 35.303 | 4.018 | 10412.31 | 0.5 | 143 | 7150 | 7444801        | 14889601       | 7.17  |
| Harvesting | OSR       | CT | 36.550 | 3.642 | 4386.447 | 0.5 | 138 | 6900 | 3026648        | 6053297        | 6.78  |
| Harvesting | OSR       | CT | 34.493 | 4.261 | 18259.08 | 0.5 | 136 | 6800 | 12416173       | 24832346       | 7.40  |
| Harvesting | OSR       | ST | 27.520 | 6.362 | 2298799  | 0.5 | 133 | 6650 | 152870110<br>3 | 305740220<br>6 | 9.49  |
| Harvesting | OSR       | ST | 32.400 | 4.892 | 77962.72 | 0.5 | 130 | 6500 | 50675771       | 101351542      | 8.01  |
| Harvesting | OSR       | ST | 25.767 | 6.890 | 7753860  | 0.5 | 128 | 6400 | 496247043<br>7 | 992494087<br>5 | 10.00 |
| Harvesting | Wheat     | CT | 34.403 | 4.289 | 19434.9  | 0.5 | 120 | 6000 | 11660942       | 23321884       | 7.37  |
| Harvesting | Wheat     | CT | 35.773 | 3.876 | 7516.339 | 0.5 | 116 | 5800 | 4359476        | 8718953        | 6.94  |
| Harvesting | Wheat     | CT | 36.232 | 3.738 | 5468.632 | 0.5 | 118 | 5900 | 3226493        | 6452986        | 6.81  |
| Harvesting | Wheat     | ST | 35.370 | 3.997 | 9941.922 | 0.5 | 159 | 7950 | 7903828        | 15807655       | 7.20  |
| Harvesting | Wheat     | ST | 36.490 | 3.660 | 4572.797 | 0.5 | 155 | 7750 | 3543917        | 7087835        | 6.85  |
| Harvesting | Wheat     | ST | 31.373 | 5.201 | 158879.6 | 0.5 | 157 | 7850 | 124720469      | 249440939      | 8.40  |
| Harvesting | Wheat (C) | CT | 29.903 | 5.644 | 440310.6 | 0.5 | 151 | 7550 | 332434518      | 664869035      | 8.82  |
| Harvesting | Wheat (C) | CT | 30.870 | 5.353 | 225240.8 | 0.5 | 143 | 7150 | 161047191      | 322094382      | 8.51  |
| Harvesting | Wheat (C) | CT | 31.497 | 5.164 | 145856.6 | 0.5 | 149 | 7450 | 108663195      | 217326390      | 8.34  |
| Harvesting | Wheat (C) | ST | 29.143 | 5.873 | 745819   | 0.5 | 132 | 6600 | 492240559      | 984481118      | 8.99  |
| Harvesting | Wheat (C) | ST | 35.343 | 4.006 | 10127.47 | 0.5 | 128 | 6400 | 6481582        | 12963163       | 7.11  |
| Harvesting | Wheat (C) | ST | 27.817 | 6.272 | 1871370  | 0.5 | 123 | 6150 | 115089251<br>5 | 230178503<br>0 | 9.36  |

Calculating copy number (CN) g<sup>-1</sup> of soil and g<sup>-1</sup> of root samples following qPCR

Sample concentration was determined following amplification cycle. The standard curve was developed in order to calculate the gene CN of 10 µL reaction of each dilution. The mean Ct value of each unknown sample was calculated using the equation line of the standard curve to get the estimated log value. The concentration was then back calculated to determine the CN g<sup>-1</sup> of the original soil or root sample. The concentration of each DNA sample (both soil and root) was normalised to 10 ng µL<sup>-1</sup>, and in each 10 µL reaction mixture 1 µL normalised DNA was used. Further information on these calculations are described here:

Example calculation for soil:

CN g<sup>-1</sup> of soil = ((Calculated CN X Original DNA concentration X dilution factor)/10) X 4

DNA concentration used for the reaction

The calculated CN from the Ct value of the sample was 549

Original DNA concentration of the sample was 86 ng µL<sup>-1</sup>

DNA was dissolved in 50 µL H<sub>2</sub>O

DNA concentration used for the each reaction was 10 ng µL<sup>-1</sup>

Soil used for the DNA extraction was 0.25 g

CN g<sup>-1</sup> of soil = ((549 X 86 X 50)/10) X 4 = 944,280 copies per g soil

Example calculation for root:

CN g<sup>-1</sup> of root = (Calculated CN X Original DNA concentration X dilution factor) X

2

DNA concentration used for the reaction

The calculated CN from the Ct value of the sample was 549

Original DNA concentration of the sample was 108 ng µL<sup>-1</sup>

DNA was dissolved in 50  $\mu$ L H<sub>2</sub>O

DNA concentration used for the each reaction was 10 ng  $\mu$ L<sup>-1</sup>

Root sample used for the DNA extraction was 0.50 g

CN g<sup>-1</sup> of root =  $(549 \times 108 \times 50) \times 2 = 5929$
